# Supplementary material for: A comparative study of the density of surface states in solid and hollow TiO2 microspheres
Source: Royal Society of Chemistry journal article supplement (doi:10.1039/c8qi00633d), 2018-01-01
Supplement: c8qi00633d1.pdf [file c8qi00633d1.pdf]

## **Comparative Study of Density of Surface States in Solid and Hollow TiO<sub>2</sub> Microspheres**

Chun Gao<sup>a,b</sup>, Yu-Qi Peng<sup>a,b</sup>, Lin-Hua Hu<sup>a,\*</sup>, Li-E Mo<sup>a,\*\*</sup>, Xian-Xi Zhang<sup>c</sup>, Tasawar Hayat<sup>d</sup>, Ahmed Alsaedi<sup>d</sup>, and Song-Yuan Dai<sup>a,e,\*\*\*</sup>

*<sup>a</sup> Key Laboratory of Photovoltaic and Energy Conservation Materials, Institute of Applied Technology, Hefei Institutes of Physical Science, Chinese Academy of Sciences, Hefei 230031, P. R. China*

*<sup>b</sup> University of Science and Technology of China, Hefei 230026, P. R. China*

*<sup>c</sup> Shandong Provincial Collaborative Innovation Center of Chemical Energy Storage & Novel Cell Technology, Liaocheng University, Liaocheng 252000, P. R. China*

*<sup>d</sup> NAAM Research Group, Department of Mathematics, Faculty of Science, King Abdulaziz University, Jeddah, 21589, Saudi Arabia*

*<sup>e</sup> Beijing Key Laboratory of Novel Thin Film Solar Cells, North China Electric Power University, Beijing 102206, P. R. China*

\* Corresponding author.

E-mail address: lhhu@rntek.cas.cn (LH Hu)

Tel: +86 55165593222

\*\* Corresponding author.

E-mail address: lemo@rntek.cas.cn (LE Mo)

Tel: +86 55165595021

\*\*\* Corresponding author.

E-mail address: sydai@ncepu.edu.cn (SY Dai)

Tel: +86 1061772268

**Table S1.** Film thicknesses of the four films based on the four kinds of TiO<sub>2</sub> microspheres.

| Samples                            | SM                | HM                | rSM               | rHM               |
|------------------------------------|-------------------|-------------------|-------------------|-------------------|
| Film thicknesses ( $\mu\text{m}$ ) | 13.5 ( $\pm$ 0.2) | 13.2 ( $\pm$ 0.1) | 13.7 ( $\pm$ 0.2) | 13.4 ( $\pm$ 0.2) |

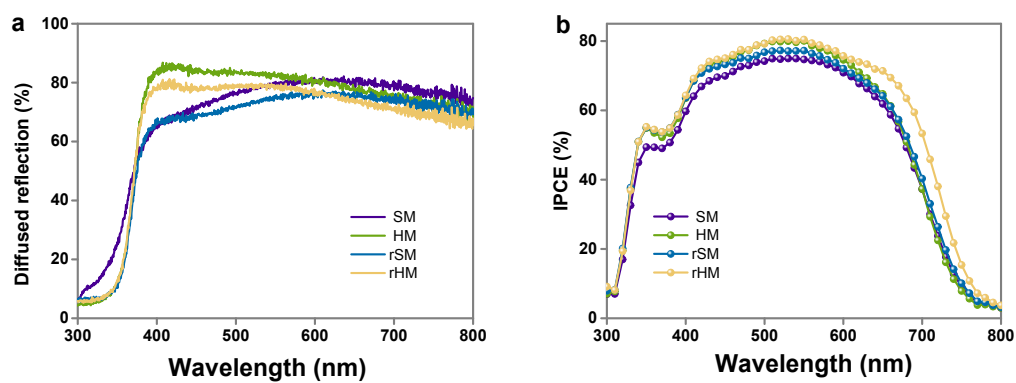

Fig. S1 (a) Diffused reflection spectra of the four photoanodes. (b) IPCE spectra of DSSCs fabricated from the four photoanodes.
